# Supplementary material
Source: publisher figshare collection journal article supplement (https://gsapubs.figshare.com/ndownloader/files/40053535)
Supplement: Supplementary file 1 [file 40053535]

## Sheet: Sheet1
1 . Apatite fission track data: Samples and data used in simulations
Data type	Data source
AFT single grain ages and individual track lengths	This study (Table 3,4)
Treatment: each bedrock sample was counted as a separated constraint in HeFTy
Error (Ma) applied in modeling: the 1σ sample standard deviation of each sample was applied
2. Additional geologic information
Assumption	Explanation and source
Initial condition began at a high temperature of 160–200 °C	Available AFT data indicated complete apatite annealing at this high temperature
AFT ages were set through the apatite PAZ temperature range of 60–110 °C	The AFT system is especially sensitive to this temperature range (60-110 °C); Gleadow and Duddy, 1981
Surface temperature of 20 ± 10 °C was reached by 0 Ma	Average surface temperature is end-member minimum estimate. (Ketcham et al., 2000, 1999)
3. System-and model-specific parameters
Modeling Code: HeFTy v1 .9.1
FT annealing model: Multi-kinetic annealing model of Ketcham et al. (2007); the Dpar values and the angle with C-axis parameters were applied.
Statistical fitting criteria: GOF values > 0.05 for accepted fit; GOF values > 0.5 for good fit; Only more than 100 best T-t curves were taken into account (Barbarand et al., 2003)；
Number of t–T paths attempted: >10,000 for each sample
t–T path characteristics: reheating allowed after AFT age.
